# Supplementary material for: Emotions and Food Consumption: Emotional Eating Behavior in a European Population
Source: MDPI journal article supplement (doi:10.3390/foods12040872), 2023-02-17
Supplement: s1 [file s1]

| Supplemental Table S1. Differences between study groups in emotional eating behavior during different emotional conditions (Post-Hoc Test p-values*; N = 9052) |                  |                              |                                    |                |                       |                           |                         |                  |                          |                                     |
|----------------------------------------------------------------------------------------------------------------------------------------------------------------|------------------|------------------------------|------------------------------------|----------------|-----------------------|---------------------------|-------------------------|------------------|--------------------------|-------------------------------------|
|                                                                                                                                                                | Cope with stress | Eating sweets when depressed | Consolation via eating when lonely | Boredom eating | Emotional consolation | Helping to control weight | Keeping awake and alert | Helping to relax | Making oneself feel good | Emotional eating behavior (overall) |
| Portugal vs. Croatia                                                                                                                                           | 0.001            | <0.001                       | 0.764                              | <0.001         | <0.001                | <0.001                    | <0.001                  | <0.001           | <0.001                   | 0.001                               |
| Portugal vs. Greece                                                                                                                                            | <0.001           | <0.001                       | <0.001                             | <0.001         | <0.001                | <0.001                    | <0.001                  | <0.001           | 0.805                    | <0.001                              |
| Portugal vs. Hungary                                                                                                                                           | <0.001           | 0.013                        | 0.001                              | 0.017          | 0.302                 | <0.001                    | <0.001                  | <0.001           | <0.001                   | <0.001                              |
| Portugal vs. Italy                                                                                                                                             | <0.001           | <0.001                       | <0.001                             | <0.001         | <0.001                | <0.001                    | <0.001                  | <0.001           | 0.990                    | <0.001                              |
| Portugal vs. Latvia                                                                                                                                            | <0.001           | <0.001                       | <0.001                             | <0.001         | <0.001                | <0.001                    | <0.001                  | <0.001           | <0.001                   | <0.001                              |
| Portugal vs. Lithuania                                                                                                                                         | <0.001           | <0.001                       | <0.001                             | <0.001         | <0.001                | <0.001                    | <0.001                  | <0.001           | 0.006                    | <0.001                              |
| Portugal vs. Poland                                                                                                                                            | <0.001           | <0.001                       | <0.001                             | <0.001         | <0.001                | <0.001                    | <0.001                  | <0.001           | 0.003                    | <0.001                              |
| Portugal vs. Romania                                                                                                                                           | <0.001           | <0.001                       | <0.001                             | <0.001         | 0.309                 | <0.001                    | <0.001                  | <0.001           | <0.001                   | <0.001                              |
| Portugal vs. Slovenia                                                                                                                                          | <0.001           | <0.001                       | <0.001                             | <0.001         | 0.045                 | <0.001                    | <0.001                  | <0.001           | <0.001                   | 0.002                               |
| Portugal vs. The Netherland                                                                                                                                    | <0.001           | <0.001                       | <0.001                             | <0.001         | <0.001                | <0.001                    | <0.001                  | <0.001           | <0.001                   | <0.001                              |
| Portugal vs. Serbia                                                                                                                                            | 0.018            | 0.482                        | 0.018                              | <0.001         | <0.001                | <0.001                    | <0.001                  | <0.001           | <0.001                   | 0.001                               |
| Croatia vs. Greece                                                                                                                                             | <0.001           | 0.002                        | <0.001                             | <0.001         | 0.112                 | 0.599                     | 0.005                   | 0.020            | <0.001                   | 0.001                               |
| Croatia vs. Hungary                                                                                                                                            | <0.001           | 0.123                        | 0.002                              | <0.001         | <0.001                | <0.001                    | <0.001                  | <0.001           | <0.001                   | <0.001                              |
| Croatia vs. Italy                                                                                                                                              | <0.001           | <0.001                       | <0.001                             | <0.001         | 0.578                 | 0.096                     | 0.213                   | 0.035            | <0.001                   | <0.001                              |
| Croatia vs. Latvia                                                                                                                                             | <0.001           | <0.001                       | <0.001                             | <0.001         | <0.001                | <0.001                    | 0.004                   | <0.001           | <0.001                   | <0.001                              |
| Croatia vs. Lithuania                                                                                                                                          | <0.001           | <0.001                       | <0.001                             | <0.001         | <0.001                | <0.001                    | 0.004                   | <0.001           | <0.001                   | <0.001                              |
| Croatia vs. Poland                                                                                                                                             | <0.001           | <0.001                       | <0.001                             | <0.001         | 0.549                 | <0.001                    | 0.667                   | <0.001           | 0.020                    | <0.001                              |
| Croatia vs. Romania                                                                                                                                            | <0.001           | <0.001                       | <0.001                             | 0.194          | <0.001                | <0.001                    | <0.001                  | <0.001           | <0.001                   | <0.001                              |
| Croatia vs. Slovenia                                                                                                                                           | <0.001           | <0.001                       | <0.001                             | 0.497          | <0.001                | <0.001                    | <0.001                  | <0.001           | 0.005                    | 0.299                               |
| Croatia vs. The Netherland                                                                                                                                     | <0.001           | <0.001                       | <0.001                             | <0.001         | 0.866                 | <0.001                    | <0.001                  | <0.001           | 0.697                    | 0.111                               |
| Croatia vs. Serbia                                                                                                                                             | 0.978            | 0.002                        | 0.036                              | 0.933          | <0.001                | <0.001                    | <0.001                  | 0.001            | <0.001                   | <0.001                              |
| Greece vs. Hungary                                                                                                                                             | <0.001           | 0.001                        | <0.001                             | <0.001         | <0.001                | <0.001                    | <0.001                  | <0.001           | <0.001                   | <0.001                              |
| Greece vs. Italy                                                                                                                                               | 0.461            | 0.335                        | 0.998                              | 0.824          | 0.385                 | 0.376                     | 0.144                   | 0.770            | 0.906                    | 0.598                               |

|                            |        |        |        |        |        |        |        |        |        |        |
|----------------------------|--------|--------|--------|--------|--------|--------|--------|--------|--------|--------|
| Greece vs. Latvia          | 0.154  | 0.664  | <0.001 | 0.005  | <0.001 | 0.090  | <0.001 | 0.097  | <0.001 | <0.001 |
| Greece vs. Lithuania       | <0.001 | 0.001  | <0.001 | <0.001 | <0.001 | 0.072  | <0.001 | 0.051  | 0.130  | <0.001 |
| Greece vs. Poland          | 0.667  | 0.597  | 0.040  | 0.979  | 0.353  | <0.001 | 0.029  | 0.001  | 0.056  | 0.362  |
| Greece vs. Romania         | 0.515  | 0.905  | 0.997  | 0.009  | 0.028  | <0.001 | <0.001 | 0.528  | <0.001 | 0.614  |
| Greece vs. Slovenia        | 0.485  | 0.558  | 0.061  | 0.001  | 0.052  | <0.001 | 0.666  | <0.001 | <0.001 | 0.018  |
| Greece vs. The Netherland  | 0.723  | 0.754  | 0.075  | 0.014  | 0.133  | <0.001 | 0.379  | <0.001 | <0.001 | 0.138  |
| Greece vs. Serbia          | 0.006  | <0.001 | <0.001 | 0.002  | <0.001 | <0.001 | <0.001 | 0.335  | <0.001 | <0.001 |
| Hungary vs. Italy          | <0.001 | <0.001 | <0.001 | <0.001 | <0.001 | 0.001  | <0.001 | <0.001 | <0.001 | <0.001 |
| Hungary vs. Latvia         | <0.001 | <0.001 | <0.001 | <0.001 | <0.001 | 0.005  | 0.070  | <0.001 | <0.001 | <0.001 |
| Hungary vs. Lithuania      | <0.001 | <0.001 | <0.001 | <0.001 | <0.001 | 0.013  | 0.873  | <0.001 | <0.001 | <0.001 |
| Hungary vs. Poland         | <0.001 | 0.001  | <0.001 | <0.001 | <0.001 | <0.001 | <0.001 | <0.001 | <0.001 | <0.001 |
| Hungary vs. Romania        | <0.001 | <0.001 | <0.001 | <0.001 | 0.073  | <0.001 | 0.044  | <0.001 | 0.155  | <0.001 |
| Hungary vs. Slovenia       | <0.001 | <0.001 | <0.001 | <0.001 | 0.017  | <0.001 | <0.001 | 0.320  | 0.038  | <0.001 |
| Hungary vs. The Netherland | <0.001 | <0.001 | <0.001 | <0.001 | <0.001 | 0.816  | <0.001 | 0.965  | <0.001 | <0.001 |
| Hungary vs. Serbia         | <0.001 | 0.259  | 0.362  | <0.001 | 0.001  | 0.021  | 0.482  | <0.001 | 0.503  | 0.025  |
| Italy vs. Latvia           | 0.451  | 0.461  | <0.001 | 0.005  | <0.001 | 0.381  | <0.001 | 0.036  | <0.001 | <0.001 |
| Italy vs. Lithuania        | 0.001  | 0.026  | <0.001 | <0.001 | <0.001 | 0.315  | <0.001 | 0.019  | 0.056  | <0.001 |
| Italy vs. Poland           | 0.203  | 0.101  | 0.023  | 0.815  | 0.999  | <0.001 | 0.437  | <0.001 | 0.044  | 0.711  |
| Italy vs. Romania          | 0.122  | 0.213  | 0.963  | 0.002  | 0.001  | <0.001 | <0.001 | 0.278  | <0.001 | 0.946  |
| Italy vs. Slovenia         | 0.875  | 0.571  | 0.040  | <0.001 | 0.002  | <0.001 | 0.027  | <0.001 | <0.001 | 0.002  |
| Italy vs. The Netherland   | 0.238  | 0.444  | 0.053  | 0.019  | 0.524  | <0.001 | 0.012  | <0.001 | <0.001 | 0.033  |
| Italy vs. Serbia           | <0.001 | <0.001 | <0.001 | <0.001 | <0.001 | <0.001 | <0.001 | 0.199  | <0.001 | <0.001 |
| Latvia vs. Lithuania       | 0.010  | <0.001 | 0.001  | 0.221  | 0.004  | 0.863  | 0.023  | 0.641  | <0.001 | 0.091  |
| Latvia vs. Poland          | 0.033  | 0.267  | <0.001 | 0.001  | <0.001 | <0.001 | <0.001 | 0.047  | <0.001 | <0.001 |
| Latvia vs. Romania         | 0.015  | 0.680  | <0.001 | <0.001 | <0.001 | <0.001 | 0.731  | 0.233  | <0.001 | <0.001 |
| Latvia vs. Slovenia        | 0.285  | 0.714  | <0.001 | <0.001 | <0.001 | <0.001 | <0.001 | <0.001 | <0.001 | <0.001 |
| Latvia vs. The Netherland  | 0.043  | 0.927  | 0.034  | 0.692  | <0.001 | 0.001  | <0.001 | <0.001 | <0.001 | <0.001 |

|                               |        |        |        |        |        |        |        |        |        |        |
|-------------------------------|--------|--------|--------|--------|--------|--------|--------|--------|--------|--------|
| Latvia vs. Serbia             | <0.001 | <0.001 | <0.001 | <0.001 | <0.001 | <0.001 | 0.005  | 0.545  | <0.001 | <0.001 |
| Lithuania vs. Poland          | <0.001 | <0.001 | <0.001 | <0.001 | <0.001 | <0.001 | <0.001 | 0.283  | <0.001 | <0.001 |
| Lithuania vs. Romania         | <0.001 | <0.001 | <0.001 | <0.001 | <0.001 | <0.001 | 0.017  | 0.070  | <0.001 | <0.001 |
| Lithuania vs. Slovenia        | <0.001 | 0.002  | <0.001 | <0.001 | <0.001 | <0.001 | <0.001 | <0.001 | <0.001 | <0.001 |
| Lithuania vs. The Netherlands | <0.001 | 0.002  | <0.001 | 0.107  | <0.001 | 0.003  | <0.001 | <0.001 | <0.001 | <0.001 |
| Lithuania vs. Serbia          | <0.001 | <0.001 | <0.001 | <0.001 | <0.001 | <0.001 | 0.562  | 0.339  | <0.001 | <0.001 |
| Poland vs. Romania            | 0.756  | 0.602  | 0.036  | 0.002  | <0.001 | 0.620  | <0.001 | <0.001 | <0.001 | 0.651  |
| Poland vs. Slovenia           | 0.224  | 0.177  | 0.719  | <0.001 | 0.001  | 0.092  | 0.002  | <0.001 | <0.001 | <0.001 |
| Poland vs. The Netherlands    | 0.996  | 0.333  | <0.001 | 0.005  | 0.486  | <0.001 | 0.001  | <0.001 | 0.026  | 0.008  |
| Poland vs. Serbia             | 0.005  | <0.001 | <0.001 | 0.001  | <0.001 | <0.001 | 0.001  | 0.040  | <0.001 | <0.001 |
| Romania vs. Slovenia          | 0.107  | 0.387  | 0.034  | 0.518  | 0.545  | 0.217  | <0.001 | <0.001 | 0.409  | 0.002  |
| Romania vs. The Netherlands   | 0.748  | 0.660  | 0.057  | <0.001 | <0.001 | <0.001 | <0.001 | <0.001 | 0.016  | <0.001 |
| Romania vs. Serbia            | 0.017  | <0.001 | <0.001 | 0.410  | <0.001 | <0.001 | 0.004  | 0.515  | 0.046  | <0.001 |
| Slovenia vs. The Netherlands  | 0.263  | 0.747  | <0.001 | <0.001 | <0.001 | <0.001 | 0.538  | 0.347  | 0.095  | 0.481  |
| Slovenia vs. Serbia           | <0.001 | <0.001 | <0.001 | 0.639  | <0.001 | <0.001 | <0.001 | <0.001 | 0.007  | <0.001 |
| The Netherlands vs. Serbia    | 0.009  | <0.001 | <0.001 | <0.001 | <0.001 | 0.023  | <0.001 | <0.001 | <0.001 | <0.001 |

Note: \*Mann Whintey U test; Croatia (N = 1538); Greece (N = 498); Hungary (N = 500); Italy (N = 541); Latvia (N = 636); Lithuania (N= 507); The Netherlands (N = 521); Poland (N = 586); Portugal (N = 1314); Romania (N = 821); Serbia (N = 498); Slovenia (N = 1093).

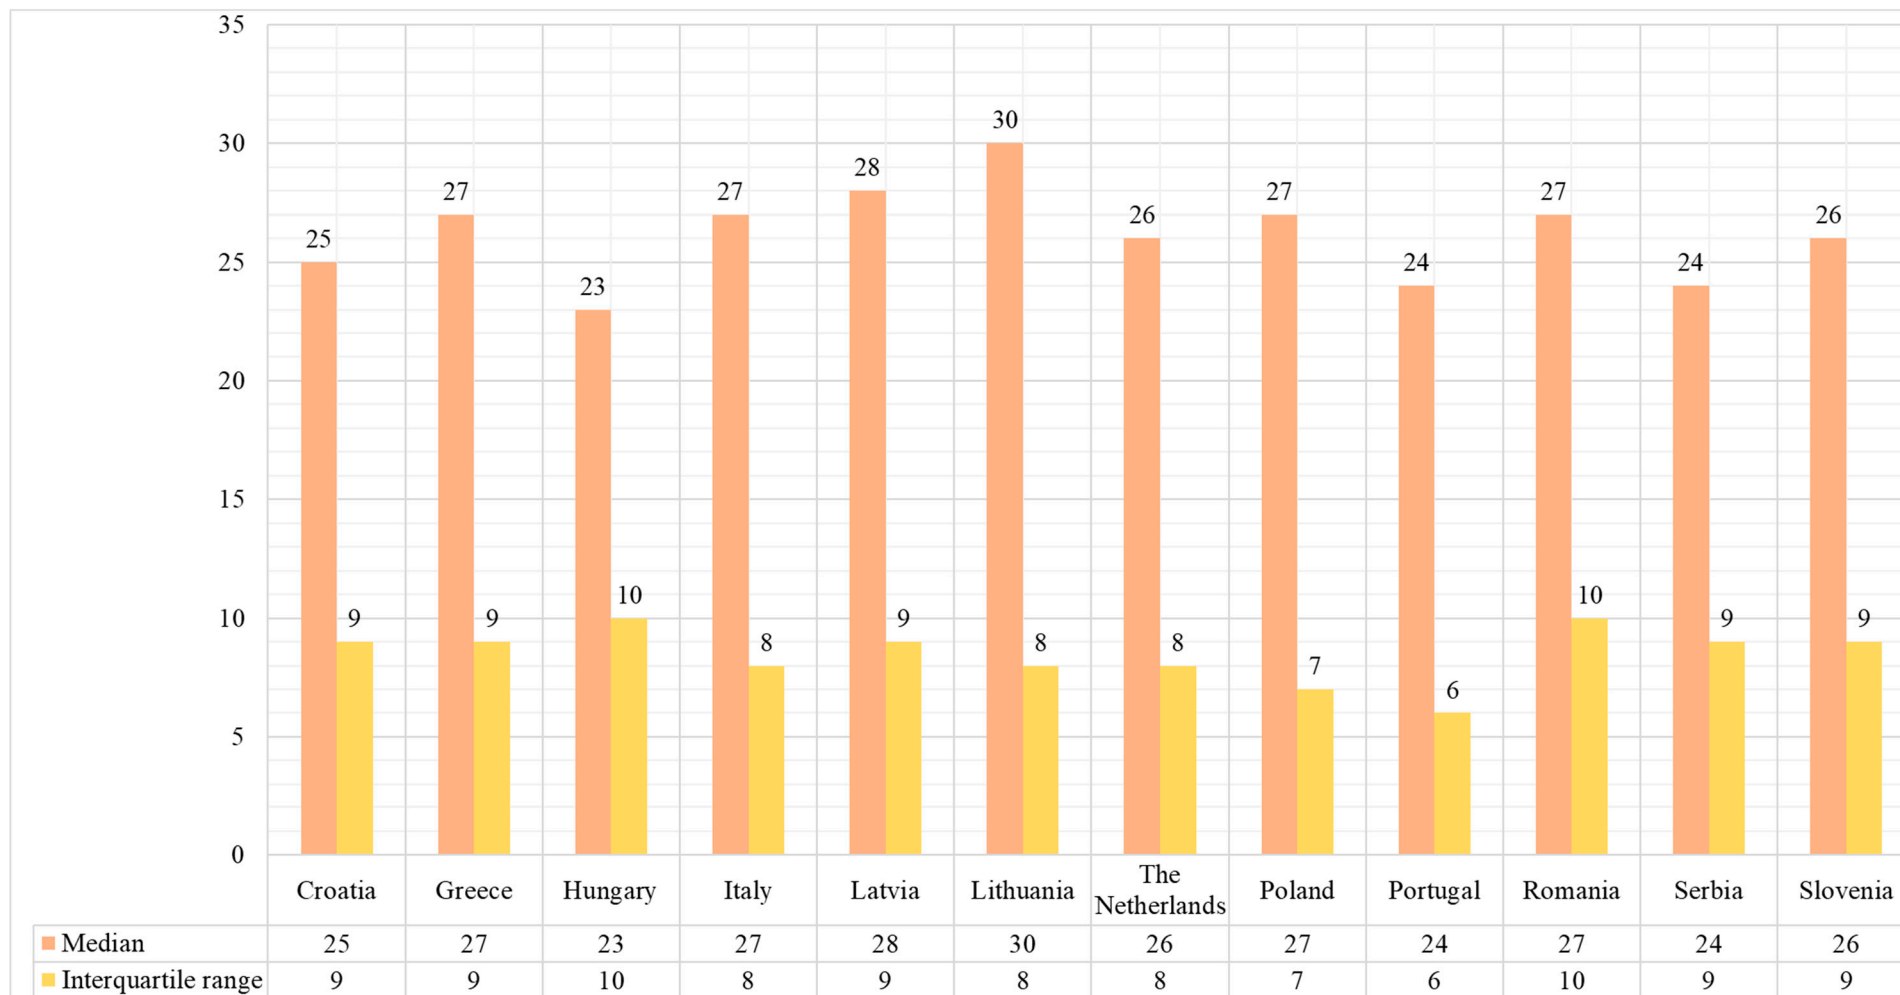

**Supplemental Figure S1.** Distribution of the emotional eating behavior in a European study population (ranging from 9 to 45).

## Motivations for Food Choices Questionnaire: EATMOT

This questionnaire aims to collect data to conduct a research on the factors that influence food choice in different countries, integrated in an international project lead by CI&DETS Research Centre of the Polytechnic Institute of Viseu, Portugal (PROJ/CI&DETS/2016/0008: EATMOT).

The participation is voluntary and all information collected is strictly confidential.

Thank you in advance for your cooperation, without which it would not be possible to realize this project. Remember that there are no good or bad answers, do not hesitate to respond.

### Reserved to the interviewer

|                         |  |                    |  |
|-------------------------|--|--------------------|--|
| Number of questionnaire |  |                    |  |
| Date                    |  | Place of interview |  |

### Target

|                |                                           |                                          |                          |
|----------------|-------------------------------------------|------------------------------------------|--------------------------|
| General public | Yes <input type="checkbox"/> <sub>1</sub> | No <input type="checkbox"/> <sub>2</sub> | Target group: _____ (2a) |
|----------------|-------------------------------------------|------------------------------------------|--------------------------|

### I. DEMOGRAPHICS DATA

The requested demographic data serves only to interpret the responses, and are absolutely confidential.

(Fill out by inserting an X or completing the spaces available).

1. Age: \_\_\_\_\_ years

2. Gender:

Female ☐ <sub>1</sub>      Male ☐ <sub>2</sub>

3. Highest education level completed:

Primary school ☐ <sub>1</sub>      Secondary school ☐ <sub>2</sub>      University ☐ <sub>3</sub>

4. Country of residence \_\_\_\_\_

**5. Living environment:**

Rural ☐<sub>1</sub>      Urban ☐<sub>2</sub>      Suburban ☐<sub>3</sub>

**6. Civil state:**

Single ☐<sub>1</sub>      Married/Living together ☐<sub>2</sub>      Divorced/Separated ☐<sub>3</sub>      Widow ☐<sub>4</sub>

**7. Present professional activity:**

Employed ☐<sub>1</sub>      Unemployed ☐<sub>2</sub>      Student ☐<sub>3</sub>  
Retired ☐<sub>4</sub>      Student worker ☐<sub>5</sub>

**8. Professional activity /studies related to any of the following areas:**

Nutrition ☐<sub>1</sub>      Food ☐<sub>2</sub>      Agriculture ☐<sub>3</sub>      Sports ☐<sub>4</sub>      Psychology ☐<sub>5</sub>

Health related activities ☐<sub>6</sub>      Which? \_\_\_\_\_ (6.a)

The professional activity is not related to any of the above areas ☐<sub>7</sub>

**9. Are you responsible for buying the food you eat?**

Yes ☐<sub>1</sub>      No ☐<sub>2</sub>

**II. ANTHROPOMETRIC DATA AND BEHAVIOURAL & HEALTH RELATED ELEMENTS**

To the best of your knowledge please fill in your current weight and height:

**10. Height:** \_\_\_\_\_ meters      or      \_\_\_\_\_ inches

**11. Weight:** \_\_\_\_\_ kg      or      \_\_\_\_\_ pounds

**12. How often do you usually engage in physical exercise?**

Never ☐<sub>1</sub>      Sporadically (less than once/week) ☐<sub>2</sub>      Occasionally (once/week) ☐<sub>3</sub>

Moderately (2-3 times/week) ☐<sub>4</sub>      Intensively (+3 times/week) ☐<sub>5</sub>

**13. On average, how many hours per day do you spend watching TV or in front of the computer? \_\_\_\_\_ hours**

**14. How often do you think that you follow a balanced/healthy diet?**

Never ☐<sub>1</sub>      Rarely ☐<sub>2</sub>      Sometimes ☐<sub>3</sub>      Frequently ☐<sub>4</sub>      Always ☐<sub>5</sub>

**15. Do you practice any specific voluntary dietary regimen?**

Raw foodism (*dietary practice of eating only uncooked, unprocessed foods*) ☐<sub>1</sub>

Fruitarianism (*diet that consists entirely or primarily of fruits and possibly nuts and seeds, without any animal products*) ☐<sub>2</sub>

Vegetarianism (*exclusion of any meat and may also include exclusion from by-products of animal slaughter*) ☐<sub>3</sub>

Veganism (*exclusion from animal products, and an associated philosophy that rejects the commodity status of animals*) ☐<sub>4</sub>

Flexitarianism (*plant-based diet with the occasional inclusion of animal products*) ☐<sub>5</sub>

Caloric restriction/Weight control ☐<sub>6</sub>

Religious restrictions ☐<sub>7</sub> Which? \_\_\_\_\_ (7.a)

Other ☐<sub>8</sub> Which? \_\_\_\_\_ (8.a)

I practice a general food regimen ☐<sub>9</sub>

#### 16. Do you have any chronic disease?

Cardiovascular diseases ☐<sub>1</sub> Diabetes ☐<sub>2</sub> High cholesterol ☐<sub>3</sub>

Arterial hypertension ☐<sub>4</sub> Gastric disorders ☐<sub>5</sub> Intestinal disorders ☐<sub>6</sub>

Obesity ☐<sub>7</sub> Other ☐<sub>8</sub> Which? \_\_\_\_\_ (8.a)

I do not suffer from chronic diseases ☐<sub>9</sub>

#### 17. Do you have any food allergy/intolerance?

Lactose intolerance ☐<sub>1</sub> Casein ☐<sub>2</sub> Gluten ☐<sub>3</sub> Nuts ☐<sub>4</sub> Shellfish ☐<sub>5</sub>

Other ☐<sub>6</sub> Which? \_\_\_\_\_ (6.a)

I do not suffer from food allergies/intolerances ☐<sub>7</sub>

#### 18. Did you at any time of your life experience an episode of any eating disorders?

Bulimia ☐<sub>1</sub> Anorexia ☐<sub>2</sub> Binge-eating ☐<sub>3</sub> Other ☐<sub>4</sub> Which? \_\_\_\_\_ (4.a)

I never experienced any eating disorders ☐<sub>5</sub>

### III. PERCEPTIONS ABOUT A HEALTHY EATING

Indicate, on the scale shown between Strongly disagree and Strongly agree, your opinion about the following statements.

(Fill out by inserting an X).

|                                               | Strongly disagree                     | Disagree                              | Neither agree nor disagree            | Agree                                 | Strongly agree                        |
|-----------------------------------------------|---------------------------------------|---------------------------------------|---------------------------------------|---------------------------------------|---------------------------------------|
| 19.1 A healthy diet is based on calorie count | <input type="checkbox"/> <sub>1</sub> | <input type="checkbox"/> <sub>2</sub> | <input type="checkbox"/> <sub>3</sub> | <input type="checkbox"/> <sub>4</sub> | <input type="checkbox"/> <sub>5</sub> |

|                                                                                |                                       |                                       |                                       |                                       |                                       |
|--------------------------------------------------------------------------------|---------------------------------------|---------------------------------------|---------------------------------------|---------------------------------------|---------------------------------------|
| 19.2 We should never consume sugary products                                   | <input type="checkbox"/> <sub>1</sub> | <input type="checkbox"/> <sub>2</sub> | <input type="checkbox"/> <sub>3</sub> | <input type="checkbox"/> <sub>4</sub> | <input type="checkbox"/> <sub>5</sub> |
| 19.3 Fruit and vegetables are very important to a practice of a healthy eating | <input type="checkbox"/> <sub>1</sub> | <input type="checkbox"/> <sub>2</sub> | <input type="checkbox"/> <sub>3</sub> | <input type="checkbox"/> <sub>4</sub> | <input type="checkbox"/> <sub>5</sub> |
| 19.4 A healthy diet should be balanced, varied and complete                    | <input type="checkbox"/> <sub>1</sub> | <input type="checkbox"/> <sub>2</sub> | <input type="checkbox"/> <sub>3</sub> | <input type="checkbox"/> <sub>4</sub> | <input type="checkbox"/> <sub>5</sub> |
| 19.5 We can eat everything, as long as it is in small quantities               | <input type="checkbox"/> <sub>1</sub> | <input type="checkbox"/> <sub>2</sub> | <input type="checkbox"/> <sub>3</sub> | <input type="checkbox"/> <sub>4</sub> | <input type="checkbox"/> <sub>5</sub> |
| 19.6 I believe that a healthy diet is not cheap                                | <input type="checkbox"/> <sub>1</sub> | <input type="checkbox"/> <sub>2</sub> | <input type="checkbox"/> <sub>3</sub> | <input type="checkbox"/> <sub>4</sub> | <input type="checkbox"/> <sub>5</sub> |
| 19.7 In my opinion it is strange that some people have cravings for sweets     | <input type="checkbox"/> <sub>1</sub> | <input type="checkbox"/> <sub>2</sub> | <input type="checkbox"/> <sub>3</sub> | <input type="checkbox"/> <sub>4</sub> | <input type="checkbox"/> <sub>5</sub> |
| 19.8 I believe that tradition is very important to a healthy diet              | <input type="checkbox"/> <sub>1</sub> | <input type="checkbox"/> <sub>2</sub> | <input type="checkbox"/> <sub>3</sub> | <input type="checkbox"/> <sub>4</sub> | <input type="checkbox"/> <sub>5</sub> |
| 19.9 I believe that food produced in a biological way is healthier             | <input type="checkbox"/> <sub>1</sub> | <input type="checkbox"/> <sub>2</sub> | <input type="checkbox"/> <sub>3</sub> | <input type="checkbox"/> <sub>4</sub> | <input type="checkbox"/> <sub>5</sub> |
| 19.10 We should never consume fat products                                     | <input type="checkbox"/> <sub>1</sub> | <input type="checkbox"/> <sub>2</sub> | <input type="checkbox"/> <sub>3</sub> | <input type="checkbox"/> <sub>4</sub> | <input type="checkbox"/> <sub>5</sub> |

#### IV. SOURCES OF INFORMATION ABOUT HEALTHY DIET

Indicate, on the scale shown between Never and Always, with what frequency you find information about eating a healthy diet.

(Fill out by inserting an X).

##### 20. Where do you usually find information about eating a healthy diet?

|                                                      | Never                                 | Sporadically                          | Sometimes                             | Frequently                            | Always                                |
|------------------------------------------------------|---------------------------------------|---------------------------------------|---------------------------------------|---------------------------------------|---------------------------------------|
| 20.1 Health centres, hospitals, general practitioner | <input type="checkbox"/> <sub>1</sub> | <input type="checkbox"/> <sub>2</sub> | <input type="checkbox"/> <sub>3</sub> | <input type="checkbox"/> <sub>4</sub> | <input type="checkbox"/> <sub>5</sub> |
| 20.2 Radio                                           | <input type="checkbox"/> <sub>1</sub> | <input type="checkbox"/> <sub>2</sub> | <input type="checkbox"/> <sub>3</sub> | <input type="checkbox"/> <sub>4</sub> | <input type="checkbox"/> <sub>5</sub> |
| 20.3 Television                                      | <input type="checkbox"/> <sub>1</sub> | <input type="checkbox"/> <sub>2</sub> | <input type="checkbox"/> <sub>3</sub> | <input type="checkbox"/> <sub>4</sub> | <input type="checkbox"/> <sub>5</sub> |



|      |                              |                                       |                                       |                                       |                                       |                                       |
|------|------------------------------|---------------------------------------|---------------------------------------|---------------------------------------|---------------------------------------|---------------------------------------|
| 20.4 | School                       | <input type="checkbox"/> <sub>1</sub> | <input type="checkbox"/> <sub>2</sub> | <input type="checkbox"/> <sub>3</sub> | <input type="checkbox"/> <sub>4</sub> | <input type="checkbox"/> <sub>5</sub> |
| 20.5 | Magazines, books, newspapers | <input type="checkbox"/> <sub>1</sub> | <input type="checkbox"/> <sub>2</sub> | <input type="checkbox"/> <sub>3</sub> | <input type="checkbox"/> <sub>4</sub> | <input type="checkbox"/> <sub>5</sub> |
| 20.6 | Internet                     | <input type="checkbox"/> <sub>1</sub> | <input type="checkbox"/> <sub>2</sub> | <input type="checkbox"/> <sub>3</sub> | <input type="checkbox"/> <sub>4</sub> | <input type="checkbox"/> <sub>5</sub> |
| 20.7 | Family, friends              | <input type="checkbox"/> <sub>1</sub> | <input type="checkbox"/> <sub>2</sub> | <input type="checkbox"/> <sub>3</sub> | <input type="checkbox"/> <sub>4</sub> | <input type="checkbox"/> <sub>5</sub> |

## V. HEALTHY MOTIVATIONS

Indicate, on the scale shown between Strongly disagree and Strongly agree, your opinion about the following statements.

(Fill out by inserting an X).

|                                                                                           | Strongly disagree                     | Disagree                              | Neither agree nor disagree            | Agree                                 | Strongly agree                        |
|-------------------------------------------------------------------------------------------|---------------------------------------|---------------------------------------|---------------------------------------|---------------------------------------|---------------------------------------|
| 21.1 I am very concerned about the hygiene and safety of the food I eat                   | <input type="checkbox"/> <sub>1</sub> | <input type="checkbox"/> <sub>2</sub> | <input type="checkbox"/> <sub>3</sub> | <input type="checkbox"/> <sub>4</sub> | <input type="checkbox"/> <sub>5</sub> |
| 21.2 It is important for me that my diet is low in fat                                    | <input type="checkbox"/> <sub>1</sub> | <input type="checkbox"/> <sub>2</sub> | <input type="checkbox"/> <sub>3</sub> | <input type="checkbox"/> <sub>4</sub> | <input type="checkbox"/> <sub>5</sub> |
| 21.3 Usually I follow a healthy and balanced diet                                         | <input type="checkbox"/> <sub>1</sub> | <input type="checkbox"/> <sub>2</sub> | <input type="checkbox"/> <sub>3</sub> | <input type="checkbox"/> <sub>4</sub> | <input type="checkbox"/> <sub>5</sub> |
| 21.4 It is important for me that my daily diet contains a lot of vitamins and minerals    | <input type="checkbox"/> <sub>1</sub> | <input type="checkbox"/> <sub>2</sub> | <input type="checkbox"/> <sub>3</sub> | <input type="checkbox"/> <sub>4</sub> | <input type="checkbox"/> <sub>5</sub> |
| 21.5 There are some foods that I consume regularly, even if they may raise my cholesterol | <input type="checkbox"/> <sub>1</sub> | <input type="checkbox"/> <sub>2</sub> | <input type="checkbox"/> <sub>3</sub> | <input type="checkbox"/> <sub>4</sub> | <input type="checkbox"/> <sub>5</sub> |
| 21.6 I try to eat foods that do not contain additives                                     | <input type="checkbox"/> <sub>1</sub> | <input type="checkbox"/> <sub>2</sub> | <input type="checkbox"/> <sub>3</sub> | <input type="checkbox"/> <sub>4</sub> | <input type="checkbox"/> <sub>5</sub> |
| 21.7 I avoid eating processed foods, because of their lower nutritional quality           | <input type="checkbox"/> <sub>1</sub> | <input type="checkbox"/> <sub>2</sub> | <input type="checkbox"/> <sub>3</sub> | <input type="checkbox"/> <sub>4</sub> | <input type="checkbox"/> <sub>5</sub> |
| 21.8 It is important for me to eat food that keeps me healthy                             | <input type="checkbox"/> <sub>1</sub> | <input type="checkbox"/> <sub>2</sub> | <input type="checkbox"/> <sub>3</sub> | <input type="checkbox"/> <sub>4</sub> | <input type="checkbox"/> <sub>5</sub> |

|                                                                                               |                                       |                                       |                                       |                                       |                                       |
|-----------------------------------------------------------------------------------------------|---------------------------------------|---------------------------------------|---------------------------------------|---------------------------------------|---------------------------------------|
| 21.9 There are some foods that I consume regularly, even if they may raise my blood glycaemia | <input type="checkbox"/> <sub>1</sub> | <input type="checkbox"/> <sub>2</sub> | <input type="checkbox"/> <sub>3</sub> | <input type="checkbox"/> <sub>4</sub> | <input type="checkbox"/> <sub>5</sub> |
| 21.10 I avoid foods with genetically modified organisms                                       | <input type="checkbox"/> <sub>1</sub> | <input type="checkbox"/> <sub>2</sub> | <input type="checkbox"/> <sub>3</sub> | <input type="checkbox"/> <sub>4</sub> | <input type="checkbox"/> <sub>5</sub> |

## VI. EMOTIONAL MOTIVATIONS

Indicate, on the scale shown between Strongly disagree and Strongly agree, your opinion about the following statements.

(Fill out by inserting an X).

|                                                                                               | Strongly disagree                     | Disagree                              | Neither agree<br>nor disagree         | Agree                                 | Strongly agree                        |
|-----------------------------------------------------------------------------------------------|---------------------------------------|---------------------------------------|---------------------------------------|---------------------------------------|---------------------------------------|
| 22.1 Food helps me cope with stress                                                           | <input type="checkbox"/> <sub>1</sub> | <input type="checkbox"/> <sub>2</sub> | <input type="checkbox"/> <sub>3</sub> | <input type="checkbox"/> <sub>4</sub> | <input type="checkbox"/> <sub>5</sub> |
| 22.2 I usually eat food that helps me control my weight                                       | <input type="checkbox"/> <sub>1</sub> | <input type="checkbox"/> <sub>2</sub> | <input type="checkbox"/> <sub>3</sub> | <input type="checkbox"/> <sub>4</sub> | <input type="checkbox"/> <sub>5</sub> |
| 22.3 I often consume foods that keep me awake and alert (such as coffee, coke, energy drinks) | <input type="checkbox"/> <sub>1</sub> | <input type="checkbox"/> <sub>2</sub> | <input type="checkbox"/> <sub>3</sub> | <input type="checkbox"/> <sub>4</sub> | <input type="checkbox"/> <sub>5</sub> |
| 22.4 I often consume foods that helps me relax (such as some teas, red wine)                  | <input type="checkbox"/> <sub>1</sub> | <input type="checkbox"/> <sub>2</sub> | <input type="checkbox"/> <sub>3</sub> | <input type="checkbox"/> <sub>4</sub> | <input type="checkbox"/> <sub>5</sub> |
| 22.5 Food makes me feel good                                                                  | <input type="checkbox"/> <sub>1</sub> | <input type="checkbox"/> <sub>2</sub> | <input type="checkbox"/> <sub>3</sub> | <input type="checkbox"/> <sub>4</sub> | <input type="checkbox"/> <sub>5</sub> |
| 22.6 When I feel lonely, I console myself by eating                                           | <input type="checkbox"/> <sub>1</sub> | <input type="checkbox"/> <sub>2</sub> | <input type="checkbox"/> <sub>3</sub> | <input type="checkbox"/> <sub>4</sub> | <input type="checkbox"/> <sub>5</sub> |
| 22.7 I eat more when I have nothing to do                                                     | <input type="checkbox"/> <sub>1</sub> | <input type="checkbox"/> <sub>2</sub> | <input type="checkbox"/> <sub>3</sub> | <input type="checkbox"/> <sub>4</sub> | <input type="checkbox"/> <sub>5</sub> |
| 22.8 For me, food serves as an emotional consolation                                          | <input type="checkbox"/> <sub>1</sub> | <input type="checkbox"/> <sub>2</sub> | <input type="checkbox"/> <sub>3</sub> | <input type="checkbox"/> <sub>4</sub> | <input type="checkbox"/> <sub>5</sub> |
| 22.9 I have more cravings for sweets when I am depressed                                      | <input type="checkbox"/> <sub>1</sub> | <input type="checkbox"/> <sub>2</sub> | <input type="checkbox"/> <sub>3</sub> | <input type="checkbox"/> <sub>4</sub> | <input type="checkbox"/> <sub>5</sub> |

Thank you for your precious collaboration!
